# Supplementary material
Source: HighWire-hosted journal article supplement (https://bmjopen.bmj.com/content/15/3/e093565)
Supplement: inline-supplementary-material-1 [file inline-supplementary-material-1.pdf]

Questionnaire No. \_\_\_\_\_

Dear Parents:

We are researchers from Wuxi Children's Hospital. We sincerely invite you to participate in our research project. This study aims to understand the knowledge, attitude, and practice towards myopia among parents of primary school students, to serve as the basis for developing scientific intervention strategies, which may help many others in the future to improve their health conditions. Your participation in this study is voluntary, and the research has been approved by the Ethics Review Committee. If you agree to participate, please read the following instructions:

1. Please complete the questionnaire. There are no right or wrong answers; you only need to provide responses based on your actual experiences. If you have any questions during the process, feel free to reach out to us, and please submit the completed questionnaire in a timely manner.

2. This study is a simple questionnaire survey and will not cause any harm to your physical or psychological well-being. However, it may involve some personal information such as your gender and age. Please rest assured that we will strictly maintain confidentiality and will not disclose your information.

3. As a participant, you can always stay informed about the information and progress related to this study. If you decide to withdraw from the study, please let us know, and your data will not be included in the research results.

Finally, we sincerely thank you for taking the time to support our scientific research amid your busy schedule!

☐I have been informed and agreed to the use of the collected data for scientific research.

Informed Consent Signature:

Date of participation: \_\_\_\_Year\_\_\_\_Month\_\_\_\_Day

Part I Basic Information

|                                                                                                                                 |                                                                                                                                                                                                                  |          |
|---------------------------------------------------------------------------------------------------------------------------------|------------------------------------------------------------------------------------------------------------------------------------------------------------------------------------------------------------------|----------|
| 1.Your gender:                                                                                                                  | a.Male                                                                                                                                                                                                           | b.Female |
| 2.Your age: _____.                                                                                                              |                                                                                                                                                                                                                  |          |
| 3.Child's grade:                                                                                                                | a. First year of primary school<br>b. Second year of primary school<br>c. Third year of primary school<br>d. Fourth year of primary school<br>e. Fifth year of primary school<br>f. Sixth year of primary school |          |
| 4.The child currently has a total of _____ siblings (related by blood, this child is not counted).                              |                                                                                                                                                                                                                  |          |
| 5.Your education:                                                                                                               | a. Primary school and below<br>b. Middle school<br>c. High school/Technical secondary school<br>d. Junior college/Bachelor's degree<br>e. Master's degree and above                                              |          |
| 6.Your work Status:                                                                                                             | a. Employed<br>b. Unemployed<br>c. Self-employed<br>d. Housewives<br>e. Others                                                                                                                                   |          |
| 7.In the past year, your monthly per capita household income was (including income in kind and rental income, etc.): _____ yuan | a.<2000<br>b.2000-5000<br>c.5000-10000<br>d.10000-20000<br>e.>20000                                                                                                                                              |          |

|                               |                    |
|-------------------------------|--------------------|
| 8.Are you nearsighted?        | a. Nearsighted     |
|                               | b. Not nearsighted |
| 9. Is your child nearsighted? | a. Nearsighted     |
|                               | b. Not nearsighted |

Part II Knowledge of myopia

|                                                                                                                                                                                                          |           |         |           |
|----------------------------------------------------------------------------------------------------------------------------------------------------------------------------------------------------------|-----------|---------|-----------|
| 1. Myopia is the result of overdevelopment of the eyeball, which is essentially a shortening of the eye axis.                                                                                            | a.Correct | b.Wrong | c.Unclear |
| 2. The complications of high myopia are mainly fundus lesions, such as: retinal detachment, retinochoroidal atrophy, macular haemorrhage, macular fissure, etc.                                          | a.Correct | b.Wrong | c.Unclear |
| 3. Low-density atropine drops are effective in slowing the development of myopia.                                                                                                                        | a.Correct | b.Wrong | c.Unclear |
| 4. Mydriasis is a routine form of eye examination and treatment.                                                                                                                                         | a.Correct | b.Wrong | c.Unclear |
| 5. To give your eyes adequate rest, get up and move around every 20 minutes when working and studying, and stand in front of a window and look 20 feet (6m) away for at least 20 seconds.                | a.Correct | b.Wrong | c.Unclear |
| 6. During home Internet classes, you should ensure that the room is well-lit and adjust the brightness of your child's electronic devices appropriately, not too bright or too dark.                     | a.Correct | b.Wrong | c.Unclear |
| 7. Outdoor exercise is also crucial to myopia prevention and control, but it does not matter whether the child is under daylight or not, he/she should be allowed to do more outdoor activities. (Wrong) | a.Correct | b.Wrong | c.Unclear |
| 8. Children should not read at home in too much or too little light. Make sure that indoor lighting and eye protection lamps are on at the same time.                                                    | a.Correct | b.Wrong | c.Unclear |
| 9. Wearing frame glasses is one of the best ways to control myopia; moreover, there are other options, such as Keratoscope, as well as reducing close reading & learning and increasing outdoor          | a.Correct | b.Wrong | c.Unclear |

|                                                                                                                                                                       |            |          |            |
|-----------------------------------------------------------------------------------------------------------------------------------------------------------------------|------------|----------|------------|
| <b>activities.</b>                                                                                                                                                    |            |          |            |
| <hr/>                                                                                                                                                                 |            |          |            |
| <b>10. If you need to do screen reading for a long time, you should wear anti-blue light glasses to block the harmful blue light to the eyes as much as possible.</b> | a. Correct | b. Wrong | c. Unclear |
| <hr/>                                                                                                                                                                 |            |          |            |
| <b>11. When the eyes become tired and dry, you can blink more often to relieve, and if necessary, use artificial tears to relieve the symptoms of dry eyes.</b>       | a. Correct | b. Wrong | c. Unclear |
| <hr/>                                                                                                                                                                 |            |          |            |
| <b>12. A simple computerized optometry can accurately obtain the diopters of child with myopia.</b>                                                                   | a. Correct | b. Wrong | c. Unclear |
| <hr/>                                                                                                                                                                 |            |          |            |
| <b>(Wrong)</b>                                                                                                                                                        |            |          |            |
| <hr/>                                                                                                                                                                 |            |          |            |

Part III Attitude to myopia

|                                                                                                                                      |                  |         |           |            |                     |
|--------------------------------------------------------------------------------------------------------------------------------------|------------------|---------|-----------|------------|---------------------|
| 1. I believe that glasses should only be worn when necessary to correct vision. (N)                                                  | a.Strongly agree | b.Agree | c.Neutral | d.Disagree | e.Strongly disagree |
| 2. I don't think regular vision checks are necessary until there are signs of unclear vision. (N)                                    | a.Strongly agree | b.Agree | c.Neutral | d.Disagree | e.Strongly disagree |
| 3. I don't think it matters whether my child reads in a lying down position or uses electronic devices. (N)                          | a.Strongly agree | b.Agree | c.Neutral | d.Disagree | e.Strongly disagree |
| 4. I fully support promoting the importance of vision protection for primary and secondary school students. (P)                      | a.Strongly agree | b.Agree | c.Neutral | d.Disagree | e.Strongly disagree |
| 5. If a "vision protection" parent-child activity is offered by the school or community, I would be interested in participating. (P) | a.Strongly agree | b.Agree | c.Neutral | d.Disagree | e.Strongly disagree |
| 6. I am concerned that my child's myopia may impact their future life and studies.                                                   | a.Strongly agree | b.Agree | c.Neutral | d.Disagree | e.Strongly disagree |
| 7. I am worried that my child's myopia may affect their appearance.                                                                  | a.Strongly agree | b.Agree | c.Neutral | d.Disagree | e.Strongly disagree |
| 8. I am concerned that my child's myopia may lead to low self-esteem.                                                                | a.Strongly agree | b.Agree | c.Neutral | d.Disagree | e.Strongly disagree |
| 9. If I am nearsighted, I think that glasses should only be worn when                                                                | a.Strongly agree | b.Agree | c.Neutral | d.Disagree | e.Strongly disagree |

necessary, but not necessarily all day. (N)

Part IV Practice on myopia

|                                                                                                                                                |                                                                                                                          |      |
|------------------------------------------------------------------------------------------------------------------------------------------------|--------------------------------------------------------------------------------------------------------------------------|------|
| 1. Do you take your child to engage in outdoor activities for more than 2 hours a day as much as possible? (P)                                 | a. Yes                                                                                                                   | b.No |
| 2. Do you supervise your child to do eye exercises? (P)                                                                                        | a. Yes                                                                                                                   | b.No |
| 3. Do you take your child to attend lectures or activities on popular science topics related to children's and adolescents' vision health? (P) | a. Yes                                                                                                                   | b.No |
| 4. How often you take your child to a specialised facility for an optical eye examination each year:                                           | a.Never<br>b.Once a year<br>c.Twice a year<br>d. More than twice a year                                                  |      |
| Your daily meal preparation:                                                                                                                   |                                                                                                                          |      |
| 5. If it contains eggs, meat, fish or animal liver?                                                                                            | a.Never prepare<br>b.1~2 times a week on average<br>c.3~4 times a week on average<br>d.5 or more times a week on average |      |
| 6. If it contains dairy or soya products?                                                                                                      | a.Never prepare<br>b.1~2 times a week on average<br>c.3~4 times a week on average<br>d.5 or more times a week on average |      |
| 7. If it contains fresh fruits and vegetables?                                                                                                 | a.Never prepare<br>b.1~2 times a week on average<br>c.3~4 times a week on average<br>d.5 or more times a week on average |      |
| 8. Supervise your child's reading and writing posture. (P)                                                                                     | a. Extremely<br>b. Positive<br>c. Neutral<br>d. Negative<br>e. Extremely Negative                                        |      |



|                                                                                                                                  |                       |             |            |             |                       |
|----------------------------------------------------------------------------------------------------------------------------------|-----------------------|-------------|------------|-------------|-----------------------|
|                                                                                                                                  | Positive              |             |            |             |                       |
| 9. Discourage your child from using electronic devices such as TV, cell phone, or tablet computer in the dark. (P)               | a. Extremely Positive | b. Positive | c. Neutral | d. Negative | e. Extremely Negative |
| 10. Do not allow your child to lie down while reading books or using electronic devices. (N)                                     | a. Extremely Positive | b. Positive | c. Neutral | d. Negative | e. Extremely Negative |
| 11. Discourage your child from reading books or looking at electronic products while using mobile transportation (bus, car). (P) | a. Extremely Positive | b. Positive | c. Neutral | d. Negative | e. Extremely Negative |
| 12. Discourage your child from rubbing their eyes. (P)                                                                           | a. Extremely Positive | b. Positive | c. Neutral | d. Negative | e. Extremely Negative |
| 13. Encourage your child to take breaks and relax their eyes during class breaks. (P)                                            | a. Extremely Positive | b. Positive | c. Neutral | d. Negative | e. Extremely Negative |
